# Supplementary material for: Enhancing the health potential of processed meat: the effect of chitosan or carboxymethyl cellulose enrichment on inherent microstructure, water mobility and oxidation in a meat-based food matrix
Source: Royal Society of Chemistry journal article supplement (doi:10.1039/c8fo00835c), 2018-01-01
Supplement: c8fo00835c1.pdf [file c8fo00835c1.pdf]

**Supplementary Table 1.** Formulation of the meat systems

| Ingredient      | control    | chitosan   | CMC        |
|-----------------|------------|------------|------------|
| Minced pork     | 75% (w/w)  | 75% (w/w)  | 75% (w/w)  |
| Minced back fat | 15% (w/w)  | 15% (w/w)  | 15% (w/w)  |
| Ice water       | 8.5% (w/w) | 6.5% (w/w) | 6.5% (w/w) |
| NaCl            | 1.5% (w/w) | 1.5% (w/w) | 1.5% (w/w) |
| Dietary fiber   | 0% (w/w)   | 2% (w/w)   | 2% (w/w)   |

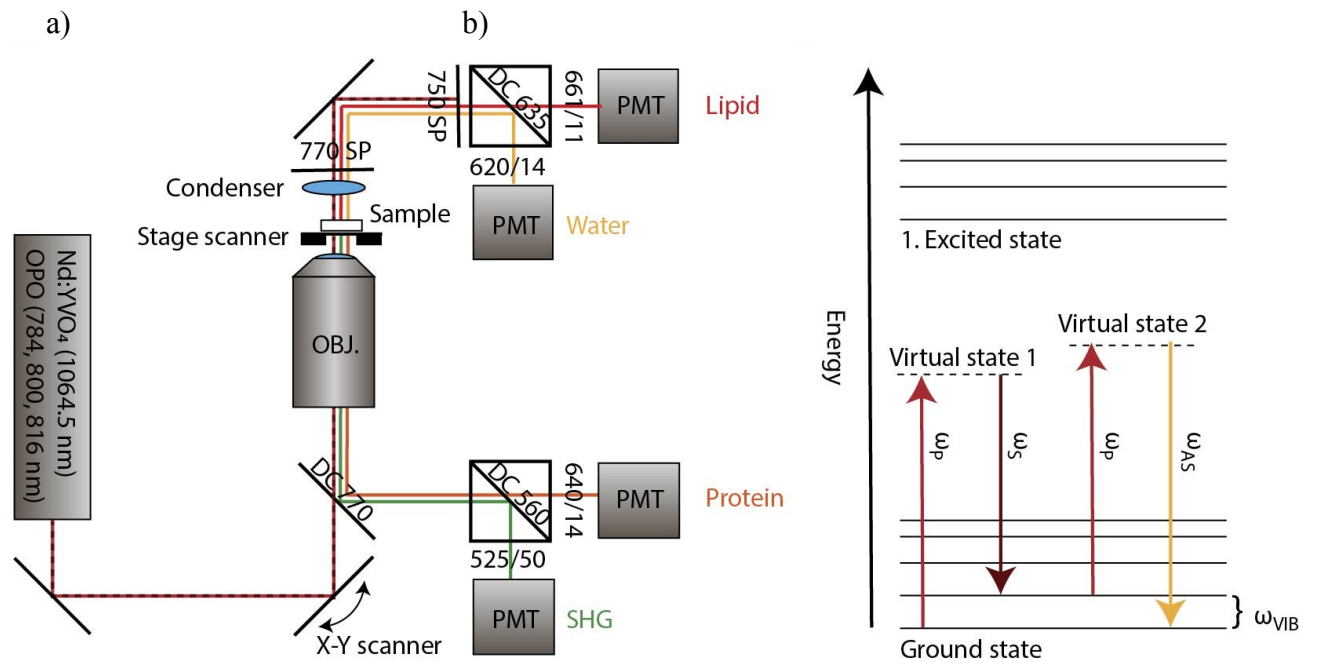

Supplementary Fig. 1. Coherent anti-Stokes Raman scattering (CARS) microscopy. a) shows an illustration of the used CARS microscope. OBJ. = objective, PMT = photomultiplier tube, DC = dichroic mirror, SP = short pass filter, SHG = second harmonic generation, OPO = optical parametric oscillator. b) Shows the excitation and energy scheme of the CARS process.

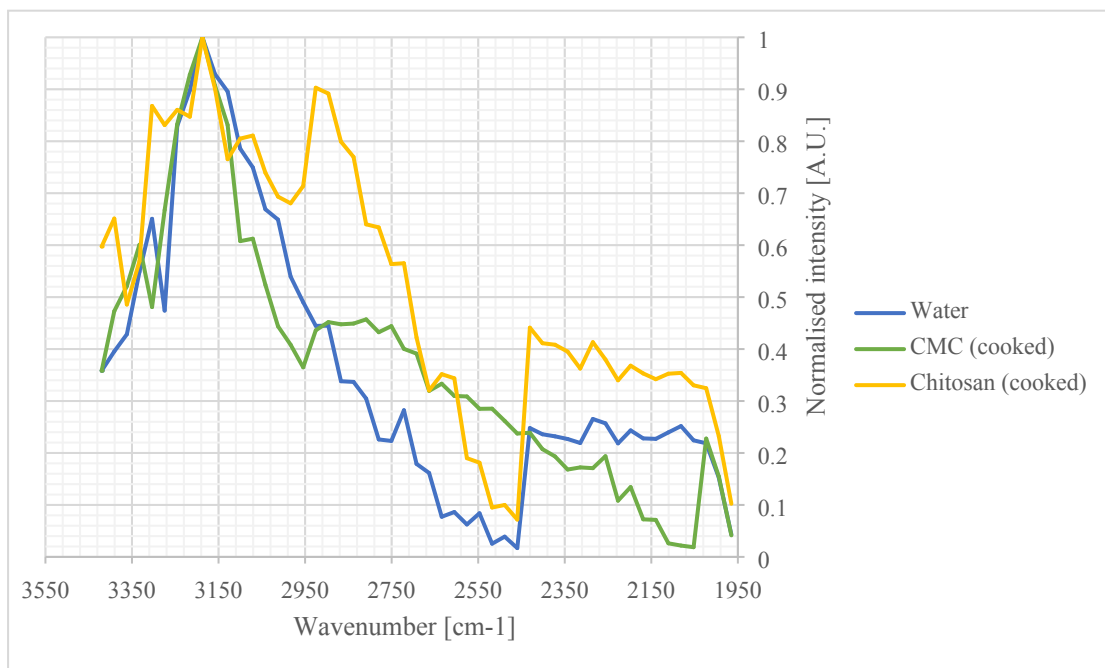

Supplementary Fig. 2. Coherent anti-Stokes Raman scattering (CARS) scan of Chitosan and CMC signal. CARS pump laser scan (780 nm – 880 nm, corresponding to emission wavenumbers of 3420 cm<sup>-1</sup> – 1965 cm<sup>-1</sup>) of water (blue), CMC in water after heat treatment (green), and chitosan in water after heat treatment (yellow). The signal is normalized to the maximum peak signal within each graph.
